# Supplementary material
Source: publisher site journal article supplement (https://www.dovepress.com/article/282722)
Supplement: Supplementary file 1 [file get_supplementary_file.php]

**Supplementary materials**

**Supplementary Table 1**: The DEGs enriched in the top of 6 of the biological process in GO term.

| Term | Gene Name |
| --- | --- |
| Up-regulated | |
| neutrophil degranulation | *ALOX5, AMPD3, ANXA3, ARG1, ARL8A, ATP11B, ATP8B4, AZU1, BST1, C3AR1, CAMP, CD177, CD55, CD58, CD59, CD63, CDA, CEACAM1, CEACAM8, CKAP4, CLEC4D, CLEC5A, CR1, CRISP3, CTSD, CTSH, CYSTM1, DEFA4, DERA, DNASE1L1, DOK3, ELANE, FABP5, FCAR, FCER1G, FOLR3, GCA, GGH, GM2A, GPR84, GYG1, HK3, HP, IDH1, LAIR1, LAMTOR1, LAMTOR2, LCN2, LILRA3, LRG1, LTF, MAPK14, MCEMP1, MGAM, MGST1, MMP8, MMP9, MPO, MS4A3, NAPRT, OLFM4, ORM1, OSCAR, P2RX1, PGLYRP1, PGM2, PLAC8, PRDX4, PSMD14, PTX3, PYGL, QSOX1, RAB27A, RAB31, RETN, RNASE2, RNASE3, S100A12, S100A9, S100P, SERPINB1, SERPINB10, SIGLEC5, SIGLEC9, SLC2A3, STOM, TCN1, TNFAIP6, TRPM2, VAMP7, VNN1,* |
| neutrophil activation | *ALOX5, AMPD3, ANXA3, ARG1, ARL8A, ATP11B, ATP8B4, AZU1, BST1, C3AR1, CAMP, CD177, CD55, CD58, CD59, CD63, CDA, CEACAM1, CEACAM8, CKAP4, CLEC4D, CLEC5A, CR1, CRISP3, CTSD, CTSH, CYSTM1, DEFA4, DERA, DNASE1L1, DOK3, ELANE, FABP5, FCAR, FCER1G, FOLR3, GCA, GGH, GM2A, GPR84, GYG1, HK3, HP, IDH1, IL18RAP, LAIR1, LAMTOR1, LAMTOR2, LCN2, LILRA3, LRG1, LTF, MAPK14, MCEMP1, MGAM, MGST1, MMP8, MMP9, MPO, MS4A3, NAPRT, OLFM4, ORM1, OSCAR, P2RX1, PGLYRP1, PGM2, PLAC8, PRDX4, PSMD14, PTX3, PYGL, QSOX1, RAB27A, RAB31, RETN, RNASE2, RNASE3, S100A12, S100A9, S100P, SERPINB1, SERPINB10, SIGLEC5, SIGLEC9, SLC2A3, STOM, TCN1, TNFAIP6, TRPM2, VAMP7, VNN1* |
| neutrophil activation involved in immune response | *, ALOX5, AMPD3, ANXA3, ARG1, ARL8A, ATP11B, ATP8B4, AZU1, BST1, C3AR1, CAMP, CD177, CD55, CD58, CD59, CD63, CDA, CEACAM1, CEACAM8, CKAP4, CLEC4D, CLEC5A, CR1, CRISP3, CTSD, CTSH, CYSTM1, DEFA4, DERA, DNASE1L1, DOK3, ELANE, FABP5, FCAR, FCER1G, FOLR3, GCA, GGH, GM2A, GPR84, GYG1, HK3, HP, IDH1, LAIR1, LAMTOR1, LAMTOR2, LCN2, LILRA3, LRG1, LTF, MAPK14, MCEMP1, MGAM, MGST1, MMP8, MMP9, MPO, MS4A3, NAPRT, OLFM4, ORM1, OSCAR, P2RX1, PGLYRP1, PGM2, PLAC8, PRDX4, PSMD14, PTX3, PYGL, QSOX1, RAB27A, RAB31, RETN, RNASE2, RNASE3, S100A12, S100A9, S100P, SERPINB1, SERPINB10, SIGLEC5, SIGLEC9, SLC2A3, STOM, TCN1, TNFAIP6, TRPM2, VAMP7, VNN1* |
| neutrophil mediated immunity | *ALOX5, AMPD3, ANXA3, ARG1, ARL8A, ATP11B, ATP8B4, AZU1, BST1, C3AR1, CAMP, CD177, CD55, CD58, CD59, CD63, CDA, CEACAM1, CEACAM8, CKAP4, CLEC4D, CLEC5A, CR1, CRISP3, CTSD, CTSH, CYSTM1, DEFA4, DERA, DNASE1L1, DOK3, ELANE, FABP5, FCAR, FCER1G, FOLR3, GCA, GGH, GM2A, GPR84, GYG1, HK3, HP, IDH1, LAIR1, LAMTOR1, LAMTOR2, LCN2, LILRA3, LRG1, LTF, MAPK14, MCEMP1, MGAM, MGST1, MMP8, MMP9, MPO, MS4A3, NAPRT, OLFM4, ORM1, OSCAR, P2RX1, PGLYRP1, PGM2, PLAC8, PRDX4, PSMD14, PTX3, PYGL, QSOX1, RAB27A, RAB31, RETN, RNASE2, RNASE3, S100A12, S100A9, S100P, SERPINB1, SERPINB10, SIGLEC5, SIGLEC9, SLC2A3, STOM, TCN1, TNFAIP6, TRPM2, VAMP7, VNN1* |
| regulation of inflammatory response | *ANXA1, BCL6, BST1, C1QA, C1QB, C1QC, C3AR1, C5orf30, CD55, CD59, CEBPA, CLU, CR1, CST7, ELANE, FCER1G, HGF, IL10, IL1R2, JAK2, LILRA5, MAPK14, METRNL, MGST2, MMP8, MMP9, NLRP12, OSM, PGLYRP1, PIK3AP1, PROS1, S100A12, S100A9, SOCS3, SUCNR1, TNFAIP6, VAMP7, VSIG4* |
| cellular response to toxic substance | *ALOX5AP, ANXA1, ARG1, CLIC2, CYP1B1, DHFR, GSR, GSTO1, HGF, HMOX1, HP, IL10, IL18RAP, LCN2, MGST1, MGST2, MPO, PRDX4, S100A9, SPI1, TRPM2, TXN* |
| Down-regulated | |
| T cell activation | *BCL11B, BTN3A1, CAMK4, CCL5, CCR6, CCR7, CD160, CD1C, CD2, CD27, CD3D, CD3E, CD3G, CD4, CD46, CD5, CD7, CD81, CD8A, CLC, DPP4, EOMES, F2RL1, FCGR2B, FGL2, FYN, GATA3, GPR18, GPR183, HLA-DMB, HLA-DPA1, HLA-E, IL7R, IRF1, ITGAL, ITK, LAT, LAX1, LCK, LEF1, LFNG, LY9, NFATC2, NLRC3, PRKCQ, PRKDC, PTGER4, RASGRP1, RHOH, RPL22, RSAD2, RUNX3, SATB1, SIT1, SLAMF6, TBX21, TCF7, TESPA1, THEMIS, ZAP70, ZFP36L2* |
| lymphocyte differentiation | *BCL11B, BLNK, CAMK4, CCR6, CCR7, CD2, CD27, CD3D, CD3E, CD3G, CD4, CD46, CD79A, CD8A, DOCK10, EOMES, FCGR2B, FGL2, FLT3LG, GATA3, GPR18, GPR183, IKZF3, IL7R, IRF1, ITGA4, ITK, LCK, LEF1, LFNG, LY9, MS4A1, NFATC2, PRKDC, PTGER4, RASGRP1, RHOH, RPL22, RSAD2, RUNX3, SATB1, SLAMF6, TBX21, TCF7, TESPA1, THEMIS, ZAP70, ZFP36L2* |
| T cell differentiation | *BCL11B, CAMK4, CCR6, CCR7, CD2, CD27, CD3D, CD3E, CD3G, CD4, CD46, CD8A, EOMES, FGL2, GATA3, GPR18, GPR183, IL7R, IRF1, ITK, LCK, LEF1, LFNG, LY9, NFATC2, PRKDC, PTGER4, RASGRP1, RHOH, RPL22, RSAD2, RUNX3, SATB1, SLAMF6, TBX21, TCF7, TESPA1, THEMIS, ZAP70, ZFP36L2* |
| T cell receptor signaling pathway | *BTN3A1, BTN3A2, BTN3A3, CCR7, CD160, CD247, CD3D, CD3E, CD3G, CD4, CD81, FYN, GATA3, GBP1, HLA-DPA1, HLA-DQA1, HLA-DQB1, HLA-DRA, ITK, LAT, LCK, LIME1, PDE4B, PRKCQ, PSMB9, PVRIG, SKAP1, TESPA1, THEMIS, TRAC, TRAT1, TRBC1, TXK, UBASH3A, ZAP70* |
| antigen receptor-mediated signaling pathway | *BTN3A1, BTN3A2, BTN3A3, CCR7, CD160, CD247, CD3D, CD3E, CD3G, CD4, CD79A, CD81, FCGR2B, FYN, GATA3, GBP1, HLA-DPA1, HLA-DQA1, HLA-DQB1, HLA-DRA, ITK, LAT, LAX1, LCK, LIME1, MS4A1, NFATC2, PDE4B, PLEKHA1, PRKCH, PRKCQ, PSMB9, PVRIG, SKAP1, TESPA1, THEMIS, TRAC, TRAT1, TRBC1, TXK, UBASH3A, ZAP70* |
| immune response-activating cell surface receptor signaling pathway | *BTN3A1, BTN3A2, BTN3A3, CCR7, CD160, CD247, CD3D, CD3E, CD3G, CD4, CD79A, CD81, ELMO1, FCGR2B, FYN, GATA3, GBP1, HLA-DPA1, HLA-DQA1, HLA-DQB1, HLA-DRA, HSP90AB1, ICAM2, ITK, LAT, LAX1, LCK, LIME1, MS4A1, NFATC2, PDE4B, PLEKHA1, PRKACB, PRKCH, PRKCQ, PSMB9, PVRIG, RPS6KA5, SKAP1, TESPA1, THEMIS, TRAC, TRAT1, TRBC1, TXK, UBASH3A, ZAP70* |

**Supplementary Table 2**: The DEGs enriched in the top of 6 of the KEGG pathway.

| Name | Gene count |
| --- | --- |
| Up-regulated | |
| Complement and coagulation cascades | *C1QA, C1QB, C1QC, C3AR1, CD55, CD59, CLU, CR1, F5, F8, PROS1, SERPINB2, VSIG4* |
| Glutathione metabolism | *GCLM, GSR, GSTO1, IDH1, MGST1, MGST2, OPLAH, RRM2* |
| Transcriptional misregulation in cancer | *BCL2A1, BCL6, CCNA1, CDKN2C, CEBPA, ELANE, GADD45A, HHEX, HPGD, IL1R2, LMO2, MMP9, MPO, SMAD1, SPI1* |
| Starch and sucrose metabolism | *GBE1, GYG1, HK3, MGAM, PGM2, PYGL* |
| Staphylococcus aureus infection | *C1QA, C1QB, C1QC, C3AR1, CAMP, DEFA4, FCAR, HLA-DRB4, IL10, SELP* |
| Down-regulated | |
| Th1 and Th2 cell differentiation | *CD247, CD3D, CD3E, CD3G, CD4, GATA3, HLA-DMA, HLA-DMB, HLA-DPA1, HLA-DQA1, HLA-DQB1, HLA-DRA, IL2RB, IL2RG, JAK1, LAT, LCK, MAML2, NFATC2, NFATC3, PRKCQ, RUNX3, STAT1, STAT4, TBX21, ZAP70* |
| Th17 cell differentiation | *CD247, CD3D, CD3E, CD3G, CD4, GATA3, HLA-DMA, HLA-DMB, HLA-DPA1, HLA-DQA1, HLA-DQB1, HLA-DRA, HSP90AB1, IL2RB, IL2RG, JAK1, LAT, LCK, NFATC2, NFATC3, PRKCQ, STAT1, TBX21, ZAP70* |
| Hematopoietic cell lineage | *CD1C, CD2, CD3D, CD3E, CD3G, CD4, CD5, CD7, CD8A, FLT3LG, HLA-DMA, HLA-DMB, HLA-DPA1, HLA-DQA1, HLA-DQB1, HLA-DRA, IL7R, ITGA4, ITGA5, ITGA6, MME, MS4A1* |
| Antigen processing and presentation | *CD4, CD8A, CREB1, HLA-DMA, HLA-DMB, HLA-DPA1, HLA-DQA1, HLA-DQB1, HLA-DRA, HLA-E, HLA-F, HSP90AB1, KIR2DL2, KIR2DS2, KLRC3, KLRD1, TAP1* |
| Primary immunodeficiency | *BLNK, CD3D, CD3E, CD4, CD79A, CD8A, IL2RG, IL7R, LCK, TAP1, UNG, ZAP70* |
| Graft-versus-host disease | *GZMB, HLA-DMA, HLA-DMB, HLA-DPA1, HLA-DQA1, HLA-DQB1, HLA-DRA, HLA-E, HLA-F, KIR2DL2, KLRD1, PRF1* |
